# Supplementary material for: Assessment of Untargeted Metabolomics by Hydrophilic Interaction Liquid Chromatography−Mass Spectrometry to Define Breast Cancer Liquid Biopsy-Based Biomarkers in Plasma Samples
Source: MDPI journal article supplement (doi:10.3390/ijms25105098), 2024-05-07
Supplement: s1 [file s1]

## Supplementary Material

Title: Assessment of Untargeted Metabolomics by Hydrophilic Interaction Liquid Chromatography – Mass Spectrometry to Define Breast Cancer Liquid Biopsy-Based Biomarkers in Plasma Samples

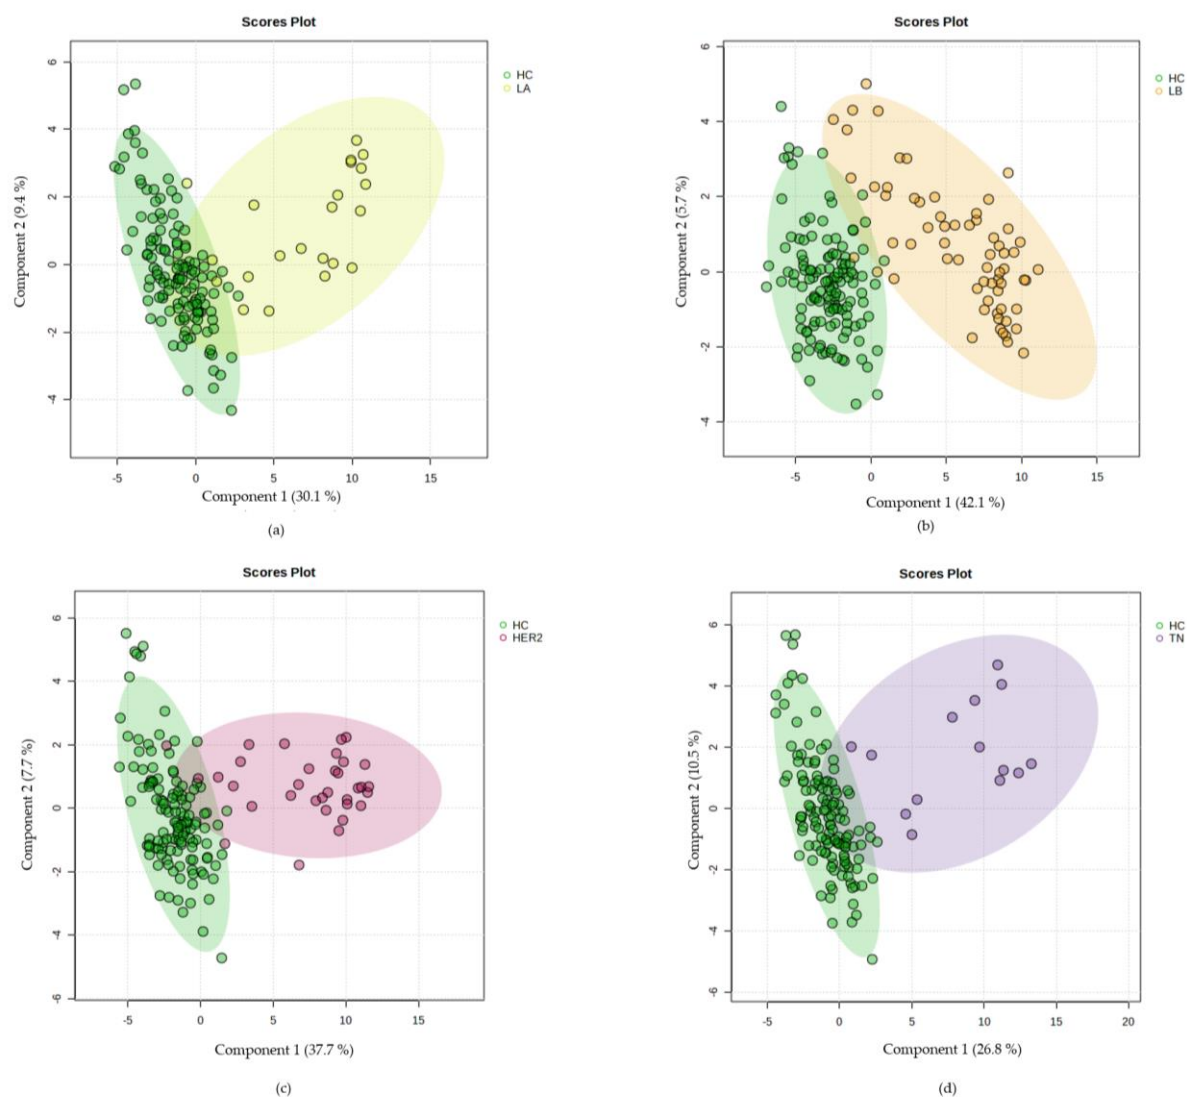

**Figure S1.** The PLS-DA score plots based on the LC-HRMS of plasma samples from BC suggests metabolome differences according to the different molecular subtypes in comparison with the HC group: (a) luminal A (LA), (b) luminal B (LB), (c) human epidermal growth factor receptor 2 positive (HER2), (d) triple negative (TN).

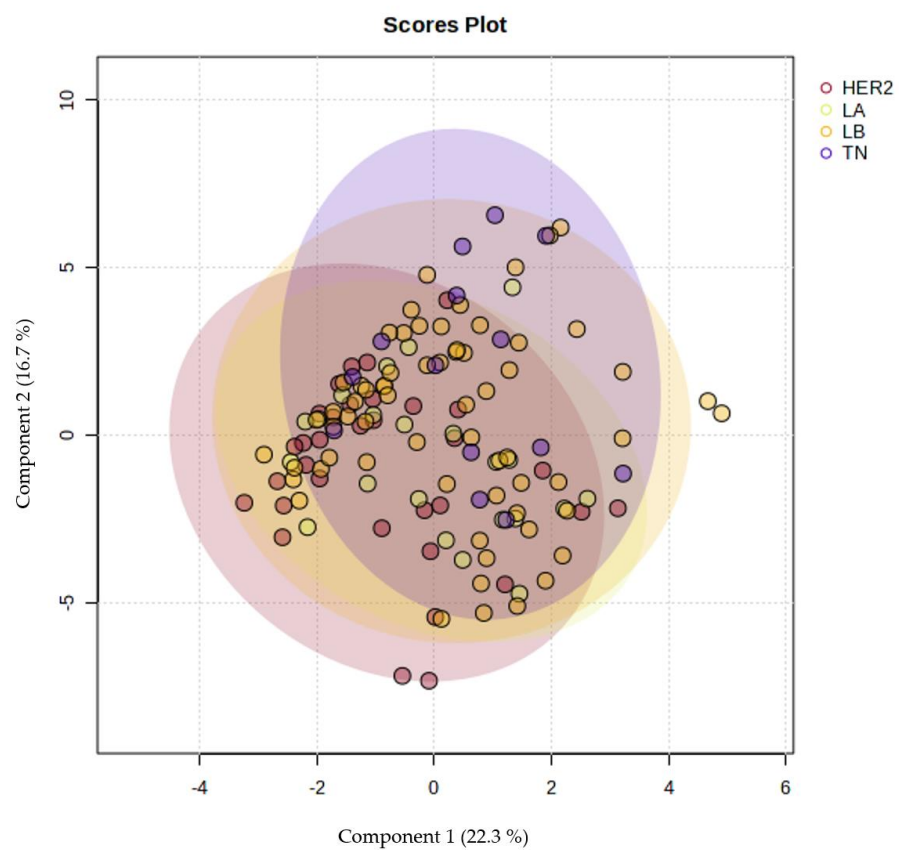

**Figure S2.** The PLS-DA score plots from the four molecular subtypes shows a clustering of the luminal samples in the middle while the human epidermal growth factor receptor 2 positive (HER2) and triple negative (TN).

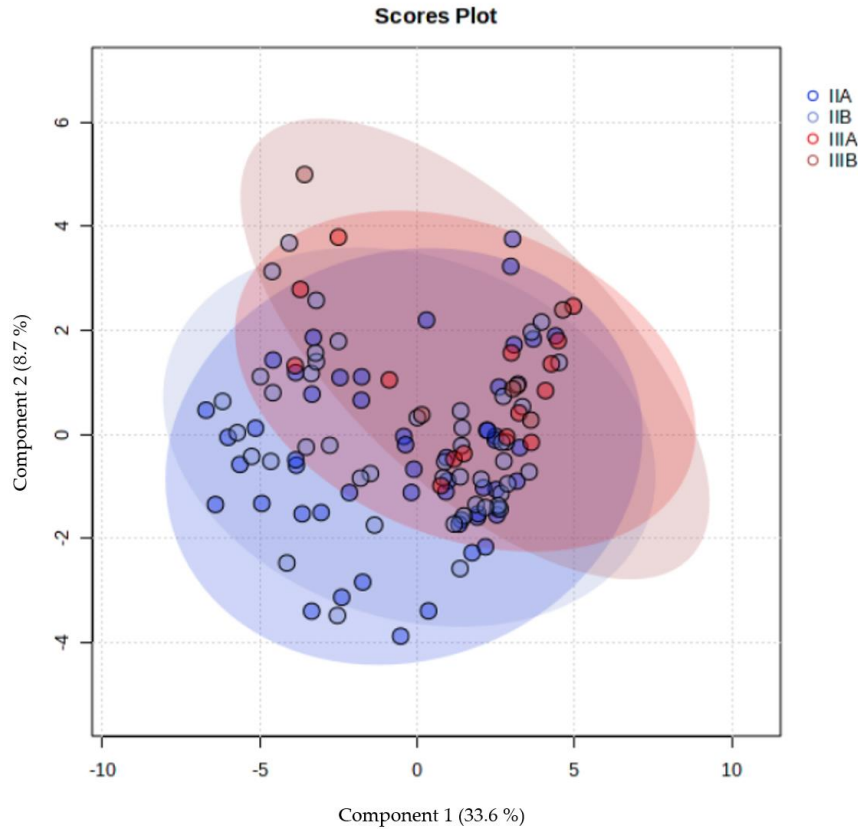

**Figure S3.** The PLS-DA plots from BC samples stratified by stages shows a clustering according to the stages II (A- dark blue, B- light blue circles) and III (A – dark red, B – light red circles).

**Table S1.** Statistical validation of the PLS-DA models based on the comparison of breast cancer (BC) molecular subtypes to healthy controls (HC).

| PLS-DA comparison | Explained Variation (%) | # Components | Accuracy | R <sup>2</sup> | Q <sup>2</sup> |
|-------------------|-------------------------|--------------|----------|----------------|----------------|
| LA-HC             | 56.4                    | 5            | 0.974    | 0.850          | 0.688          |
| LB-HC             | 61.1                    | 5            | 0.968    | 0.901          | 0.833          |
| HER2-HC           | 60.7                    | 5            | 0.969    | 0.886          | 0.767          |
| TN-HC             | 53.1                    | 5            | 0.979    | 0.883          | 0.677          |

LA: luminal A; LB: luminal B; HER2: human epidermal growth factor receptor 2; TN: triple negative; HC: healthy controls; #: number; R<sup>2</sup> and Q<sup>2</sup> parameters showed that no over-fitting was observed, and these models are acknowledged for successful discernment between HC and BC patients.

**Table S2.** List of metabolites that significantly differed between breast cancer (BC) and healthy controls (HC) samples and their respective p-value, fold change, VIP score and univariate values of AUC.

| <i>m/z</i> | R.T (min) | p-value (FDR)          | Fold Change (BC/HC) | VIP  | AUC  |
|------------|-----------|------------------------|---------------------|------|------|
| 1045.0609  | 3.16      | $4.13 \times 10^{-29}$ | 0.12                | 1.11 | 0.88 |

|           |      |                        |        |      |      |
|-----------|------|------------------------|--------|------|------|
| 988.1027  | 3.19 | $2.01 \times 10^{-55}$ | 0.14   | 2.36 | 0.93 |
| 746.3442  | 3.19 | $1.13 \times 10^{-48}$ | 0.14   | 2.33 | 0.93 |
| 992.1087  | 3.19 | $4.20 \times 10^{-54}$ | 0.15   | 2.35 | 0.93 |
| 956.1536  | 3.2  | $1.74 \times 10^{-53}$ | 0.15   | 2.17 | 0.93 |
| 1020.1459 | 3.16 | $1.76 \times 10^{-54}$ | 0.15   | 2.22 | 0.93 |
| 992.1087  | 3.19 | $1.37 \times 10^{-54}$ | 0.16   | 2.40 | 0.93 |
| 1022.1394 | 3.17 | $1.74 \times 10^{-53}$ | 0.16   | 2.38 | 0.93 |
| 974.1329  | 3.17 | $2.34 \times 10^{-51}$ | 0.17   | 2.05 | 0.92 |
| 1026.1296 | 3.16 | $1.19 \times 10^{-52}$ | 0.17   | 2.31 | 0.93 |
| 1024.1411 | 3.16 | $9.33 \times 10^{-53}$ | 0.17   | 2.45 | 0.93 |
| 1008.1211 | 3.16 | $9.33 \times 10^{-53}$ | 0.17   | 2.37 | 0.94 |
| 1030.1737 | 3.14 | $2.09 \times 10^{-51}$ | 0.18   | 2.31 | 0.93 |
| 89.0273   | 1.37 | $2.25 \times 10^{-28}$ | 0.18   | 1.06 | 0.88 |
| 886.2949  | 3.15 | $7.66 \times 10^{-44}$ | 0.18   | 2.21 | 0.93 |
| 1032.1746 | 3.15 | $1.22 \times 10^{-49}$ | 0.19   | 2.21 | 0.92 |
| 1040.1896 | 3.15 | $1.98 \times 10^{-45}$ | 0.22   | 2.10 | 0.91 |
| 1038.1741 | 3.15 | $8.66 \times 10^{-46}$ | 0.22   | 2.17 | 0.91 |
| 1044.1953 | 3.16 | $5.28 \times 10^{-44}$ | 0.22   | 2.07 | 0.91 |
| 892.3343  | 3.15 | $3.56 \times 10^{-40}$ | 0.23   | 2.25 | 0.91 |
| 635.4445  | 1.03 | $4.63 \times 10^{-15}$ | 0.23   | 1.03 | 0.78 |
| 808.3709  | 1.45 | $4.12 \times 10^{-14}$ | 0.23   | 1.02 | 0.80 |
| 816.4075  | 3.13 | $4.90 \times 10^{-38}$ | 0.24   | 2.15 | 0.91 |
| 1046.1901 | 3.15 | $7.32 \times 10^{-40}$ | 0.24   | 1.97 | 0.90 |
| 976.2954  | 3.14 | $4.67 \times 10^{-35}$ | 0.28   | 1.90 | 0.88 |
| 1054.2285 | 3.14 | $3.55 \times 10^{-35}$ | 0.28   | 1.92 | 0.87 |
| 696.7823  | 3.34 | $6.02 \times 10^{-30}$ | 0.29   | 1.87 | 0.94 |
| 902.3649  | 3.14 | $1.40 \times 10^{-31}$ | 0.30   | 2.01 | 0.86 |
| 742.4737  | 3.15 | $2.49 \times 10^{-26}$ | 0.31   | 2.35 | 0.89 |
| 828.4322  | 3.15 | $6.87 \times 10^{-26}$ | 0.33   | 1.94 | 0.86 |
| 1060.2524 | 3.13 | $3.77 \times 10^{-28}$ | 0.36   | 1.68 | 0.82 |
| 910.3963  | 3.12 | $3.77 \times 10^{-26}$ | 0.37   | 1.73 | 0.82 |
| 834.5387  | 3.36 | $9.43 \times 10^{-20}$ | 0.45   | 1.00 | 0.78 |
| 1068.2847 | 3.13 | $7.28 \times 10^{-21}$ | 0.47   | 1.51 | 0.76 |
| 870.6637  | 3.48 | $1.75 \times 10^{-44}$ | 20.97  | 1.30 | 0.93 |
| 870.6576  | 3.27 | $7.66 \times 10^{-43}$ | 22.85  | 1.28 | 0.93 |
| 810.7045  | 3.34 | $1.32 \times 10^{-45}$ | 39.07  | 1.43 | 0.93 |
| 812.6938  | 3.4  | $5.76 \times 10^{-49}$ | 50.31  | 1.50 | 0.94 |
| 642.7599  | 3.15 | $1.18 \times 10^{-44}$ | 55.71  | 1.43 | 0.93 |
| 712.7536  | 3.18 | $2.93 \times 10^{-42}$ | 61.80  | 1.41 | 0.91 |
| 880.6902  | 3.22 | $1.03 \times 10^{-48}$ | 71.83  | 1.68 | 0.93 |
| 824.8018  | 3.15 | $9.98 \times 10^{-47}$ | 88.06  | 1.84 | 0.93 |
| 630.7895  | 3.34 | $8.00 \times 10^{-48}$ | 93.27  | 1.72 | 0.93 |
| 710.7503  | 3.16 | $4.48 \times 10^{-50}$ | 94.34  | 1.63 | 0.94 |
| 836.6892  | 3.14 | $8.29 \times 10^{-48}$ | 112.18 | 1.74 | 0.94 |
| 698.7835  | 3.34 | $3.82 \times 10^{-49}$ | 141.57 | 1.91 | 0.94 |
| 822.7321  | 3.34 | $9.43 \times 10^{-49}$ | 143.02 | 1.82 | 0.94 |
| 888.7159  | 3.34 | $4.82 \times 10^{-47}$ | 169.94 | 1.97 | 0.93 |
| 764.7638  | 3.22 | $2.62 \times 10^{-46}$ | 262.58 | 1.99 | 0.93 |
| 762.7784  | 3.34 | $9.30 \times 10^{-49}$ | 348.90 | 1.99 | 0.95 |

*m/z*: mass/charge ratio; R.T: retention time; FC: fold change > 2 indicates that the average normalized peak area ratio in breast cancer (BC) samples is larger than that in healthy controls (HC); FC < 0.5 indicates that the average normalized peak area ratio in HC is larger than that in BC samples; VIP: variable of importance in projection; AUC: area under the receiver-operating characteristic curve.
